# Supplementary material for: ERp44/CG9911 promotes fat storage in Drosophila adipocytes by regulating ER Ca2+ homeostasis
Source: publisher site journal article supplement (doi:10.18632/aging.203063), 2021-05-24
Supplement: Supplementary file [file aging-v13i11-203063-supplementary-material-SD2.pdf]

## SUPPLEMENTARY TABLE

**Supplementary Table 1. Q-PCR primer sequences in this study.**

| <b>Target gene</b> | <b>Forward primer (5'→3')</b> | <b>Reverse primer (5'→3')</b> |
|--------------------|-------------------------------|-------------------------------|
| <i>β-actin</i>     | CTCGTACGTGGGTGATGAGG          | ACATACATGGCGGGTGTGTT          |
| <i>rp49</i>        | ACGTTGTGCACCAGGAACTT          | ACGTTGTGCACCAGGAACTT          |
| <i>BiP</i>         | CTGGTGTTATTGCCGGTCTG          | CTGGTGTTATTGCCGGTCTG          |
| <i>sXbp1</i>       | CAACCTTGGATCTGCCGCAG          | GACTTTCGGCCAGCTCTTCG          |
| <i>dSREBP</i>      | GCATTATGATGGCACTATTCG         | AACGTAGCTCCTGCGTTTG           |
| <i>dACC</i>        | TACGATGTAGAGTCGCAGTTC         | TACGATGTAGAGTCGCAGTTC         |
| <i>dFAS</i>        | GTGCGTCCTATCAGCTACCC          | GTGCGTCCTATCAGCTACCC          |
| <i>Lip3</i>        | CGGGTGAATCTTCCAACCGA          | GCATTGCCCATCCACACATC          |
| <i>dHSL</i>        | CGAGTGCCAGATGGTCTGTT          | CGAGTGCCAGATGGTCTGTT          |
| <i>bmm</i>         | CGAGTGCCAGATGGTCTGTT          | CGAGTGCCAGATGGTCTGTT          |
